# Supplementary material for: Mitochondrial fission regulator 2 (MTFR2) promotes growth, migration, invasion and tumour progression in breast cancer cells
Source: publisher site journal article supplement (doi:10.18632/aging.102442), 2019-11-18
Supplement: Supplementary file [file aging-v11i22-102442-supplementary-material-SD1.pdf]

## SUPPLEMENTARY FIGURE

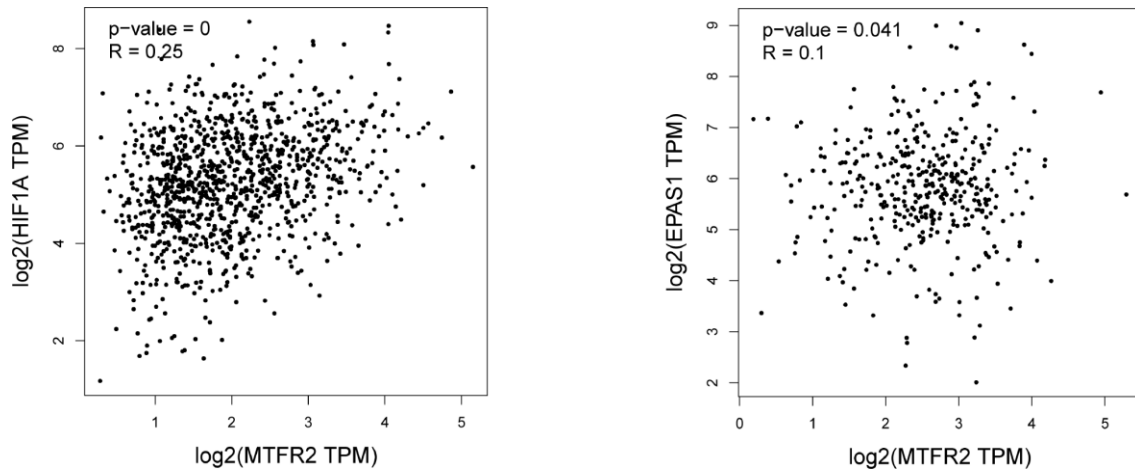

Supplementary Figure 1. The correlation between MTFR2 and HIF1  $\alpha$ , HIF2  $\alpha$ .
